# Supplementary material
Source: Springer Nature journal article supplement (https://www.springermedizin.de/resource/supplementary/13054_2013_2880_MOESM7_ESM.pdf/9714094)

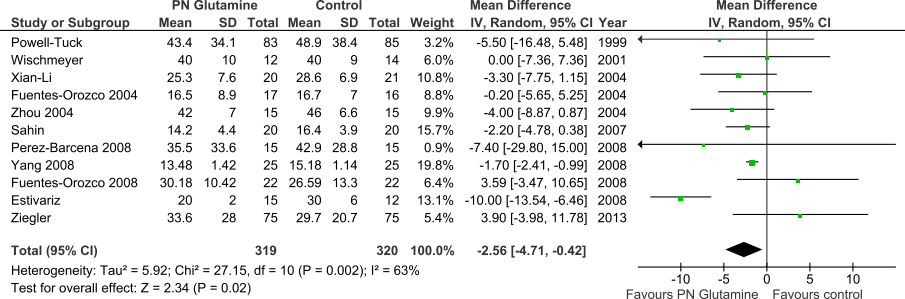

Supplement: MOESM7 [file 9714094]
